# Supplementary material for: A Molecularly Imprinted Polymer-Disposable Pipette Tip Extraction-Capillary Electrophoresis (MISPE-DPX-CE) Method for the Preconcentration and Determination of Scopolamine in Synthetic Urine Samples
Source: MDPI journal article supplement (doi:10.3390/chemosensors10100387), 2022-09-23
Supplement: s1 [file s1]

**A molecularly imprinted polymer-disposable pipette tip extraction-  
capillary electrophoresis (MISPE-DPX-CE) method for the  
preconcentration and determination of scopolamine in body fluid samples**

Weida Rodrigues Silva, Michelle M.A.C. Ribeiro, Eduardo M. Richter,  
Alex D. Batista, João Flávio da Silveira Petrucci \*

*Institute of Chemistry, Federal University of Uberlândia, Av. João Naves  
de Avila, 2121, 13400-970, Uberlândia, MG, Brazil.*

Corresponding author\* [jfpetruci@gmail.com](mailto:jfpetruci@gmail.com)

**Table S1** – Evaluation of between the variables: 1 - time, 2 - mass, 3 - extraction cycles.

|            | Effect  | %     |
|------------|---------|-------|
| <b>1</b>   | -0.0475 | 0.29  |
| <b>2</b>   | 0.6175  | 48.76 |
| <b>3</b>   | 0.5725  | 41.91 |
| <b>12</b>  | -0.1075 | 1.48  |
| <b>13</b>  | -0.0525 | 0.35  |
| <b>23</b>  | -0.2375 | 7.21  |
| <b>123</b> | 0.0075  | 0.01  |

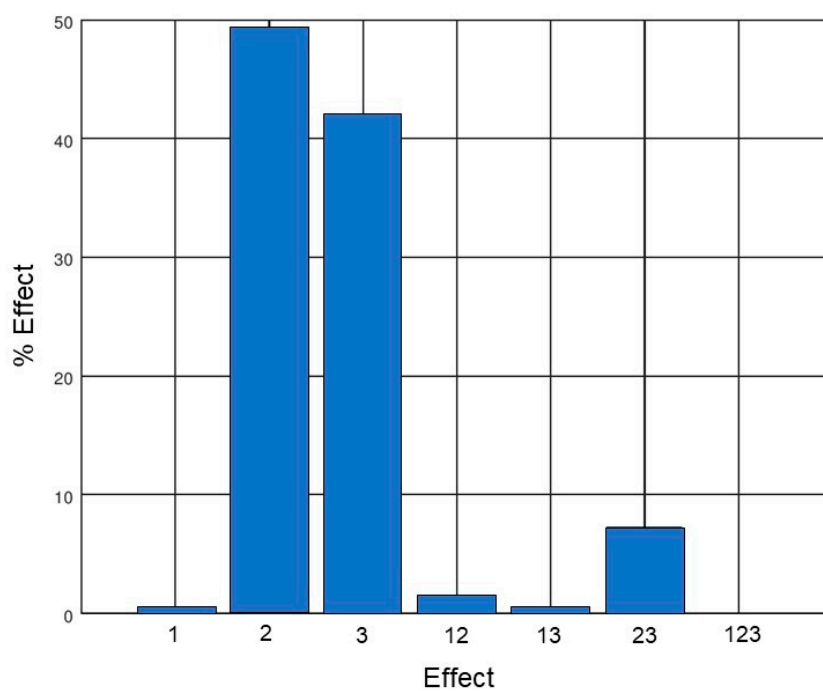

**Figure S1** – Percentage of effects found for individual variables (1, 2, 3), secondary effects (12, 13, 23), and tertiary effects (123).

**Table S2** – Evaluation of the between the variables: 1 - solvent volume, 2 - methanol concentration, 3 - elution cycles

|            | <b>Effect</b> | <b>%</b> |
|------------|---------------|----------|
| <b>1</b>   | -8.41         | 66.17    |
| <b>2</b>   | 3.06          | 8.76     |
| <b>3</b>   | 0.195         | 0.04     |
| <b>12</b>  | -2.77         | 7.18     |
| <b>13</b>  | 1.55          | 2.26     |
| <b>23</b>  | -1.25         | 1.47     |
| <b>123</b> | 3.88          | 14.12    |

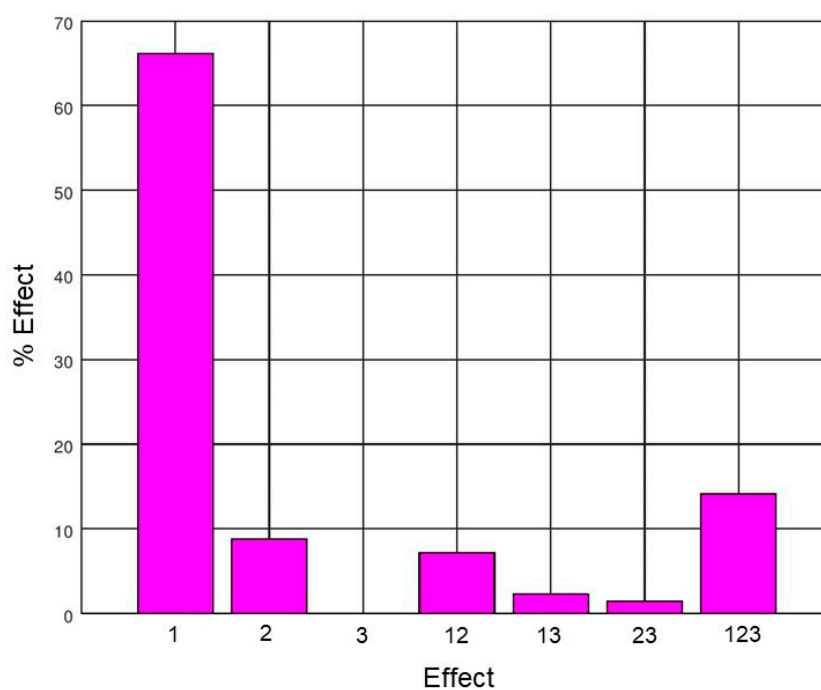

**Figure S2** – Percentage of effects found for individual variables (1, 2, 3), secondary effects (12, 13, 23), and tertiary effects (123).
